# Supplementary material
Source: MDPI journal article supplement (https://www.mdpi.com/1996-1073/13/3/678)

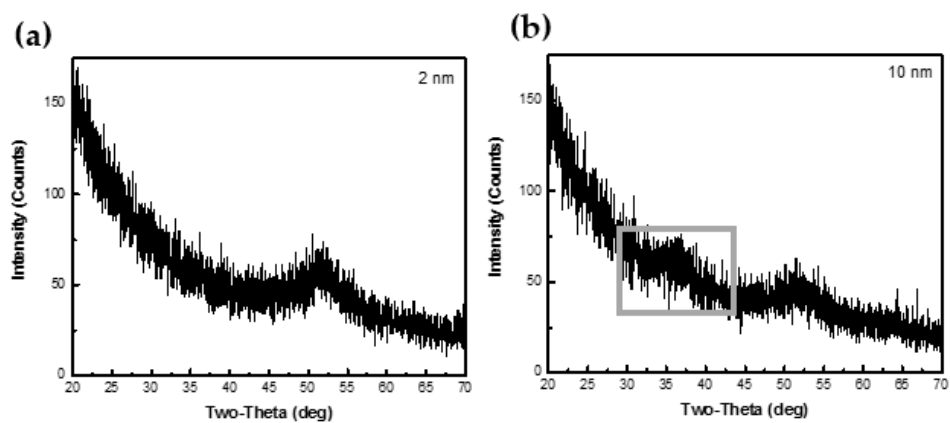

**Supporting Figure S1.** GIXRD spectra of (a) 2 nm, (b) 10 nm Ti after 250°C 50min oxidation

Supplement: s1 [file s1]
